# Supplementary material for: Interface engineering of perovskite solar cells with PEO for improved performance
Source: Royal Society of Chemistry journal article supplement (doi:10.1039/c5ta00407a), 2015-01-01
Supplement: c5ta00407a1.pdf [file c5ta00407a1.pdf]

## Electronic Supplementary Information

### Interface engineering of perovskite solar cells with PEO for improved performance

H. P. Dong<sup>a)</sup>, Y. Li<sup>b)</sup>, S. F. Wang<sup>b)</sup>, W. Z. Li<sup>a)</sup>, N. Li<sup>a)</sup>, X. D. Guo<sup>a)</sup> and Liduo Wang<sup>\*a)</sup>

a)Key Lab of Organic Optoelectronics and Molecular Engineering of Ministry of Education, Department of Chemistry, Tsinghua University, Beijing, P.R.China. E-mail: [chldwang@mail.tsinghua.edu.cn](mailto:chldwang@mail.tsinghua.edu.cn)

b)Institute of Modern Optics & State Key Laboratory for Artificial Microstructure and Mesoscopic Physics, School of Physics, Peking University, Beijing, P.R. Chian.

#### Table of content

**Fig. S1.** Contact angle test for films of FTO/TiO<sub>x</sub> and FTO/TiO<sub>x</sub>/PEO

**Fig. S2** The dissolving situation of PEO in different solvents.

**Fig. S3** Cross section image of device with PEO layer.

**Fig. S4** Survey of the XPS spectra including C1s, O1s, Ti2p peaks.

**Fig. S5** Distribution of the photovoltaic parameters of the solar cells ( $V_{oc}$ ,  $J_{sc}$ , FF and PCE): black squares for the devices with TiO<sub>x</sub> as ETL and red dots for the devices with TiO<sub>x</sub>/PEO as ETL.

**Fig. S6** *J*-*V* curves of PEO modified perovskite solar cell tested under forward and reverse scan.

**Fig. S7** UV-vis absorption and Steady-state PL spectra of films: FTO/TiO<sub>x</sub>/MAPb<sub>x</sub>Cl<sub>3-x</sub> (black curve) and FTO/TiO<sub>x</sub>/PEO/MAPb<sub>x</sub>Cl<sub>3-x</sub>(red curve).

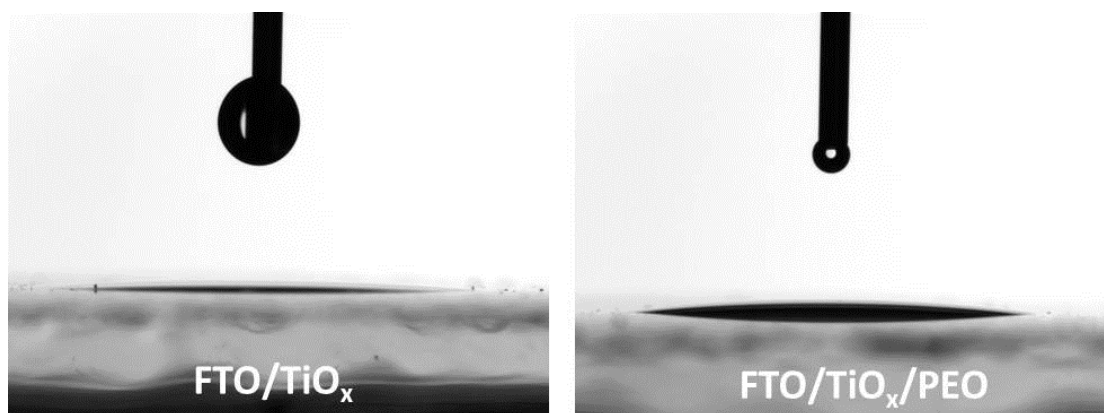

**Fig. S1** Contact angle test for films of FTO/TiO<sub>x</sub> and FTO/TiO<sub>x</sub>/PEO

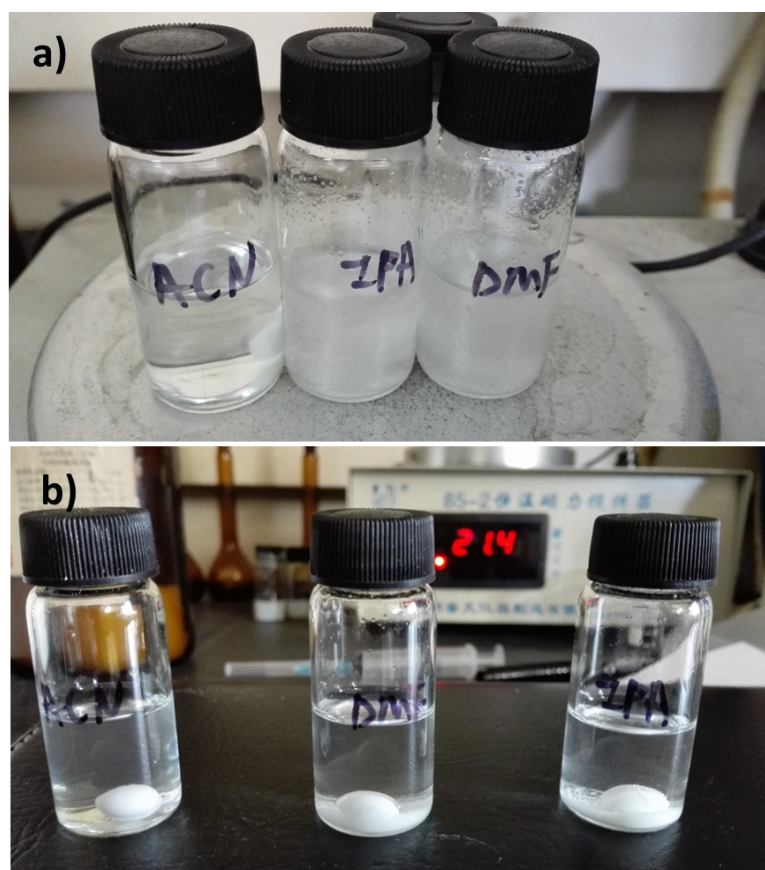

**Fig. S2** The dissolving situation of 50mg PEO in 5 mL acetonitrile (solvent for PEO we used), isopropanol (solvent for  $\text{Al}_2\text{O}_3$  nanoparticles) and dimethyl formamide (solvent for perovskite precursor). a) after stirring for 5 minutes; PEO dissolved fully in acetonitrile; the solutions with isopropanol and dimethyl formamide as solvent were still quite cloudy. b) standing for 2 minutes after stirring for 15 minutes. No precipitation was noticed for acetonitrile. But much PEO was left at the bottom for isopropanol and dimethyl formamide.

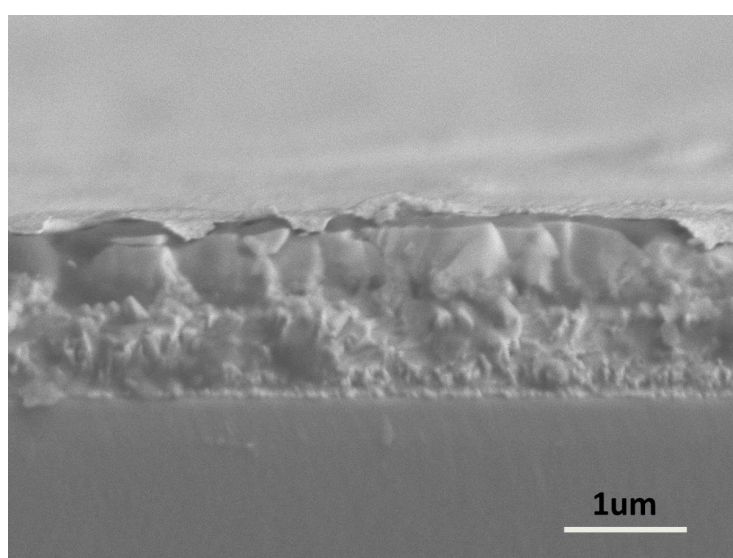

**Fig. S3** Cross section image of device with PEO layer.

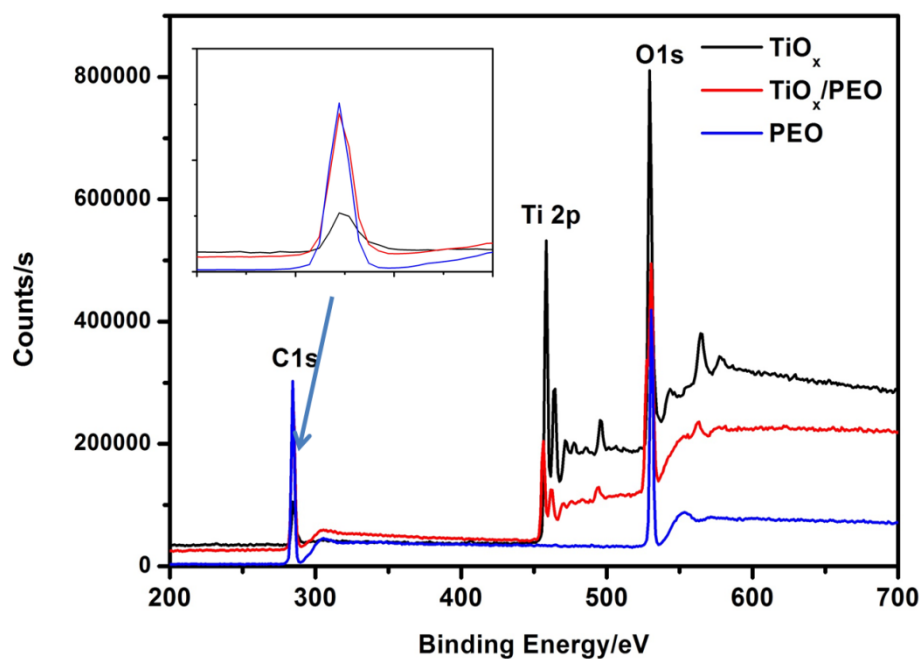

**Fig. S4** Survey of the XPS result. Insert showed the C1s peak (at 284.8eV). The spectra was calibrated with respect to the C1s peak.

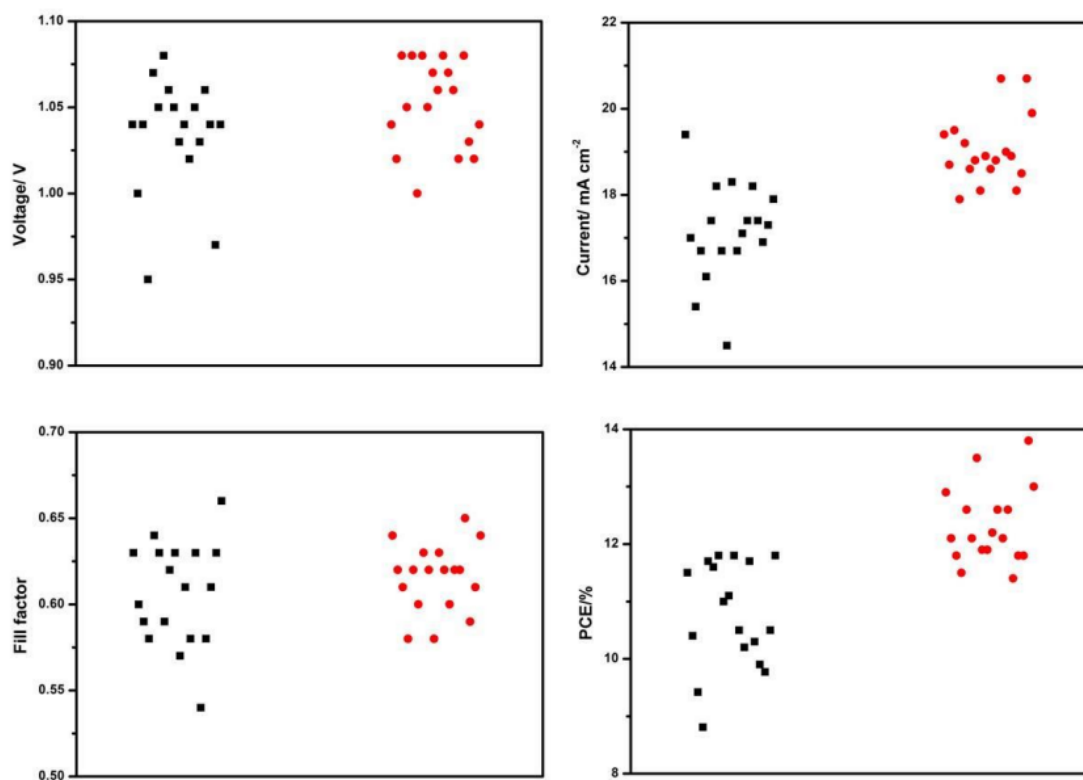

**Fig. S5** Distribution of the photovoltaic parameters of the solar cells ( $V_{\text{OC}}$ ,  $J_{\text{SC}}$ , FF and PCE): black squares for the devices with  $\text{TiO}_x$  as ETL and red dots for the devices with  $\text{TiO}_x/\text{PEO}$  as ETL.

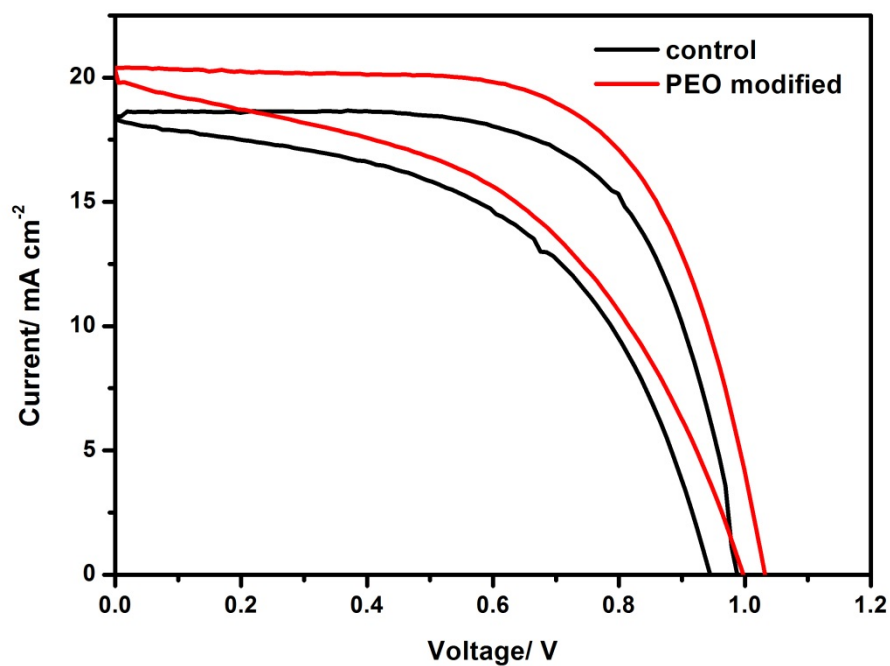

**Fig. S6** *J-V* curves of PEO modified perovskite solar cell tested under forward and reverse scan.

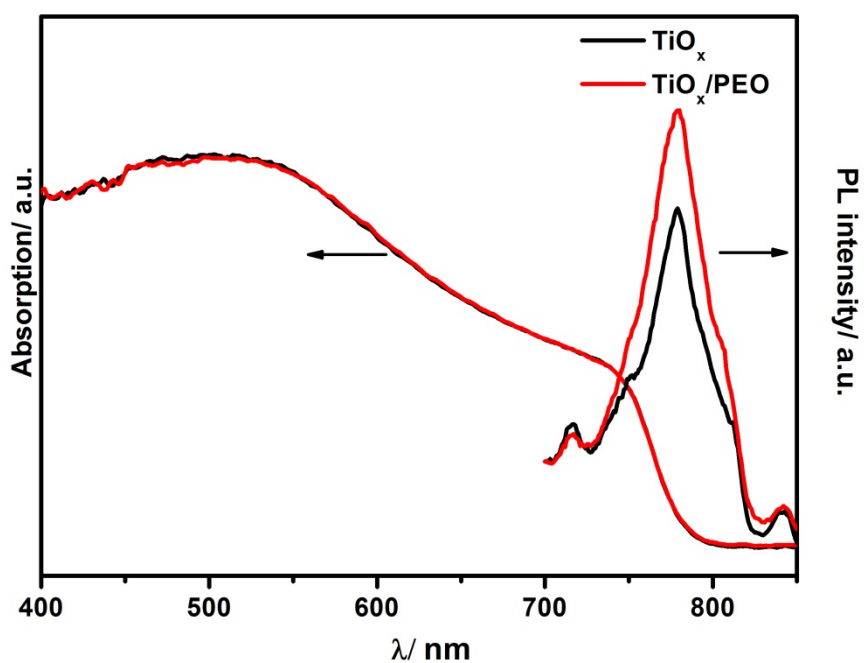

**Fig. S7** UV-vis absorption and Steady-state PL spectra of films: FTO/TiO<sub>x</sub>/MAPb<sub>x</sub>Cl<sub>3-x</sub> (black curve) and FTO/TiO<sub>x</sub>/PEO/MAPb<sub>x</sub>Cl<sub>3-x</sub> (red curve).
